# Supplementary material for: Structural heterogeneity in familial Alzheimer's disease mutants of amyloid-beta peptides
Source: Royal Society of Chemistry journal article supplement (doi:10.1039/c2mb25457c), 2013-01-07
Supplement: c2mb25457c.pdf [file c2mb25457c.pdf]

Supplementary Information for

**Structural Heterogeneity in  
Familial Alzheimer's Disease Mutants of Amyloid-Beta Peptide**

Song-Ho Chong, Janghyun Yim and Sihyun Ham<sup>\*</sup>

*Department of Chemistry, Sookmyung Women's University,  
Cheongpa-ro 47-gil 100, Yongsan-Ku, Seoul 140-742, Korea*

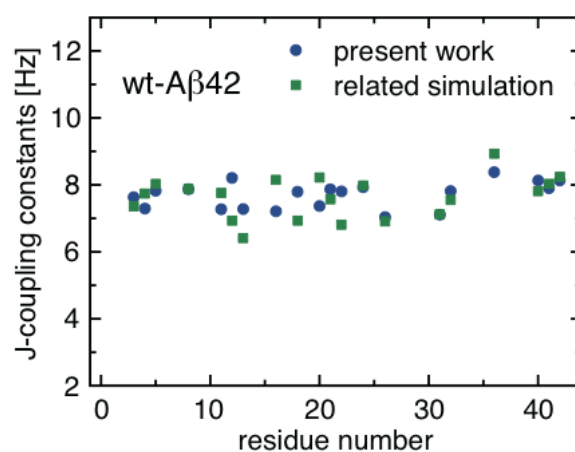

**Figure S1.** *J*-coupling constants versus amino acid residue for the wt-Aβ42 from the present work (blue circles) are compared with those from the related simulation study (K. A. Ball *et al.*, *Biochemistry*, 2011, **50**, 7612–7628, green squares).

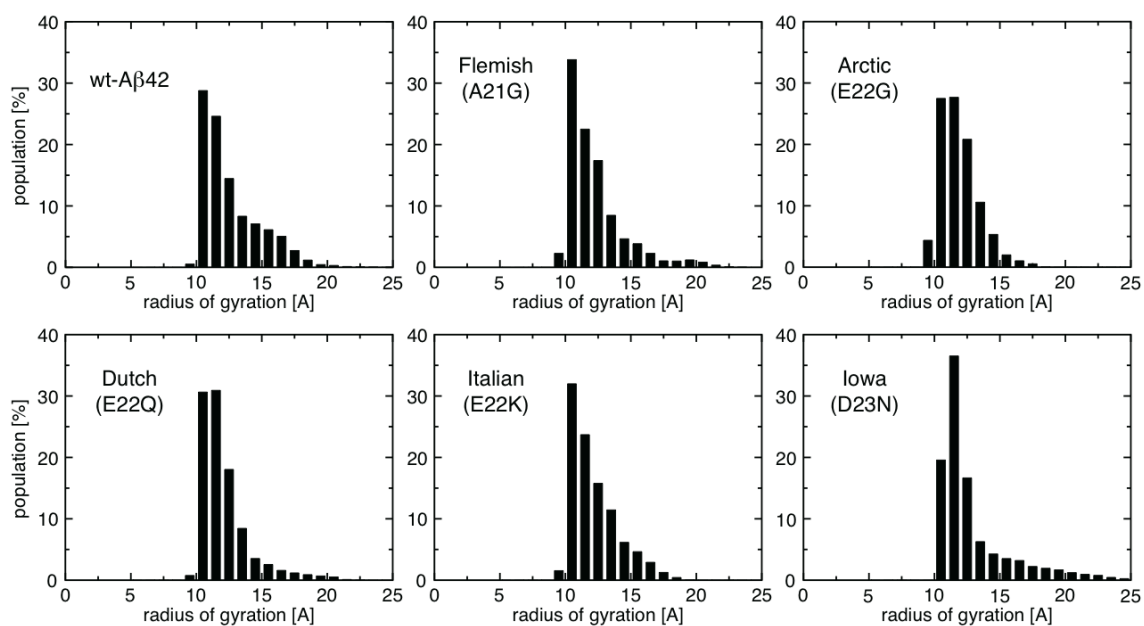

**Figure S2.** Distribution of the radius of gyration for wt-A $\beta$ 42 and its familial AD mutants indicated in each panel.

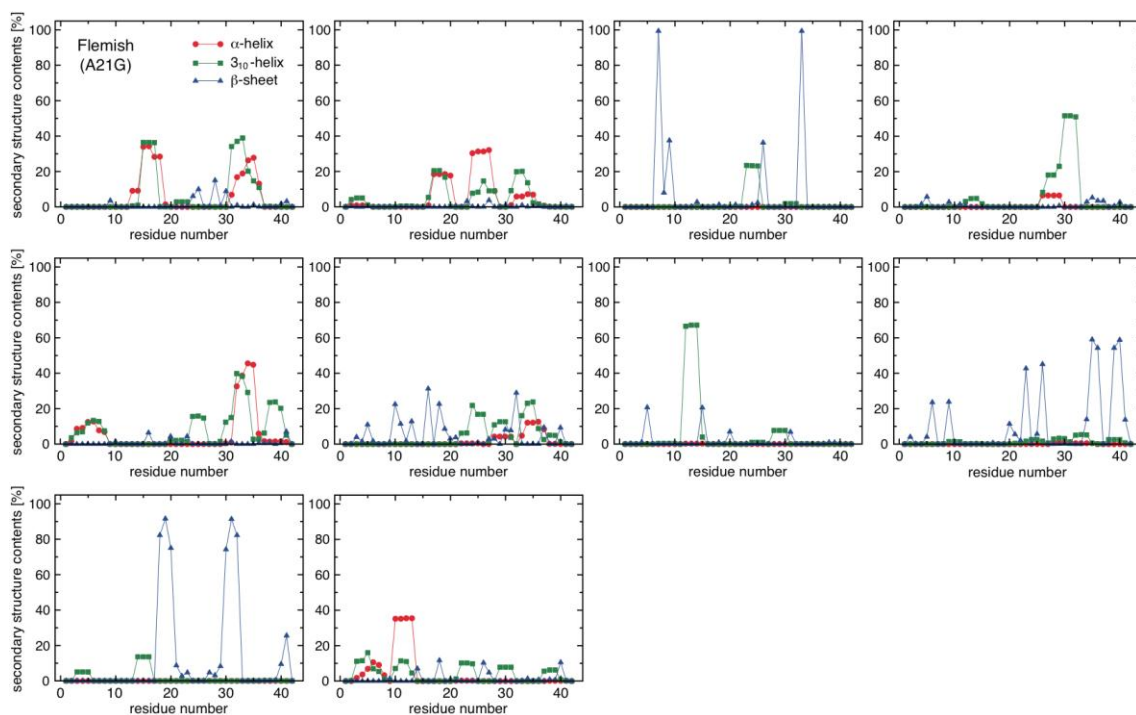

**Figure S3.** Average secondary-structure contents versus amino acid residue in each of 10 independent trajectories of the Flemish (A21G) mutant of Aβ42 (red circles: α-helix, green squares: 3<sub>10</sub>-helix, blue triangles: β-sheet).

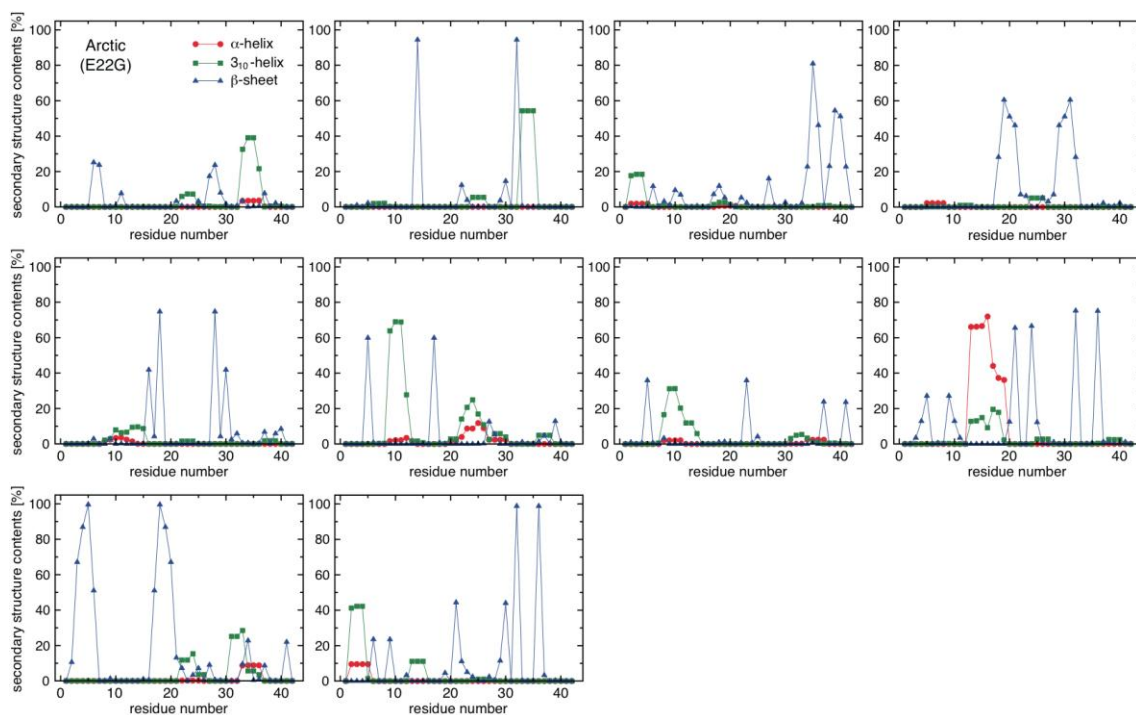

**Figure S4.** Average secondary-structure contents versus amino acid residue in each of 10 independent trajectories of the Arctic (E22G) mutant of A $\beta$ 42 (red circles:  $\alpha$ -helix, green squares:  $3_{10}$ -helix, blue triangles:  $\beta$ -sheet).

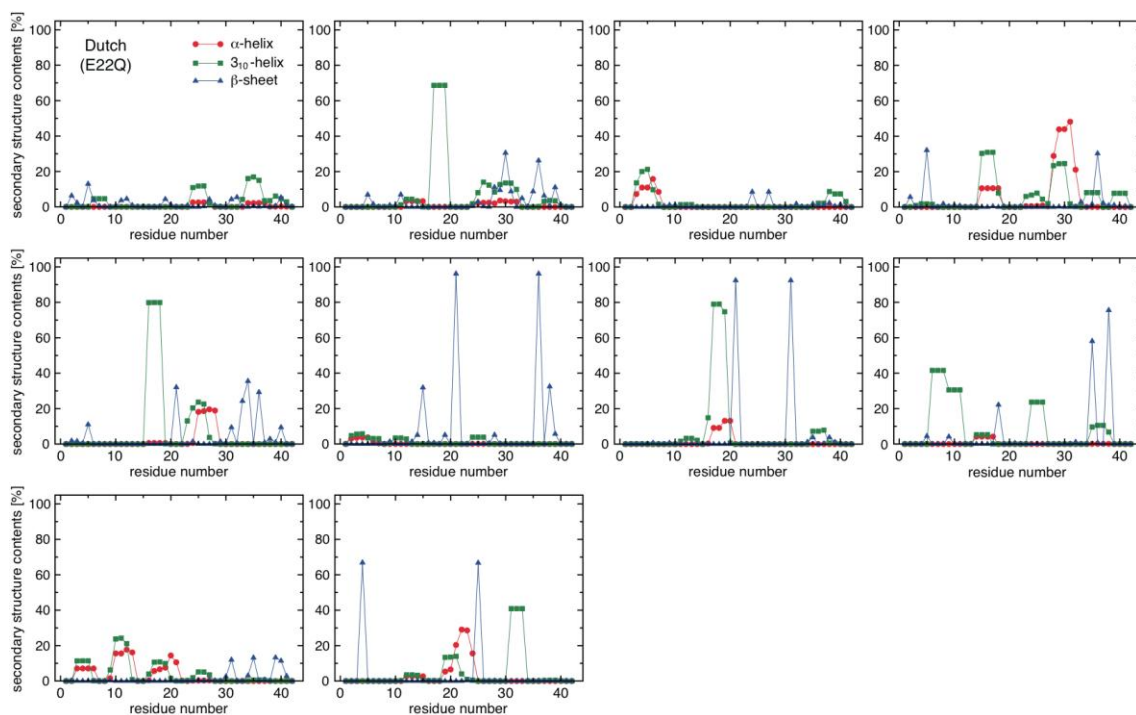

**Figure S5.** Average secondary-structure contents versus amino acid residue in each of 10 independent trajectories of the Dutch (E22Q) mutant of Aβ<sub>42</sub> (red circles: α-helix, green squares: 3<sub>10</sub>-helix, blue triangles: β-sheet).

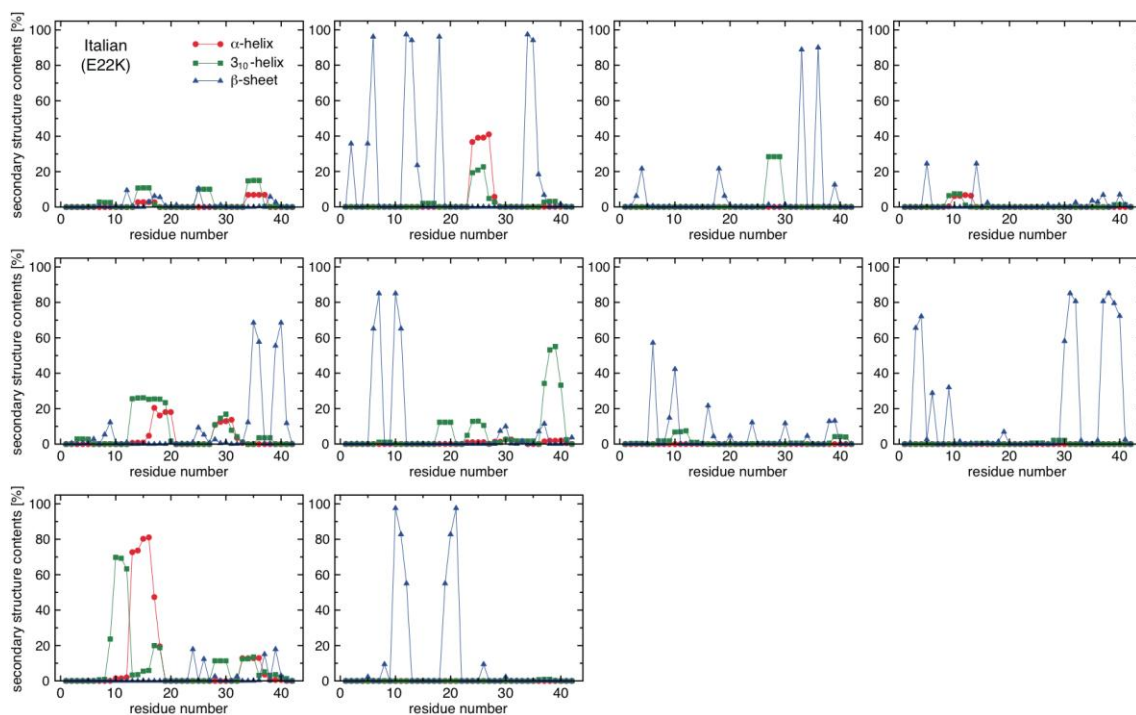

**Figure S6.** Average secondary-structure contents versus amino acid residue in each of 10 independent trajectories of the Italian (E22K) mutant of A $\beta$ 42 (red circles:  $\alpha$ -helix, green squares:  $3_{10}$ -helix, blue triangles:  $\beta$ -sheet).

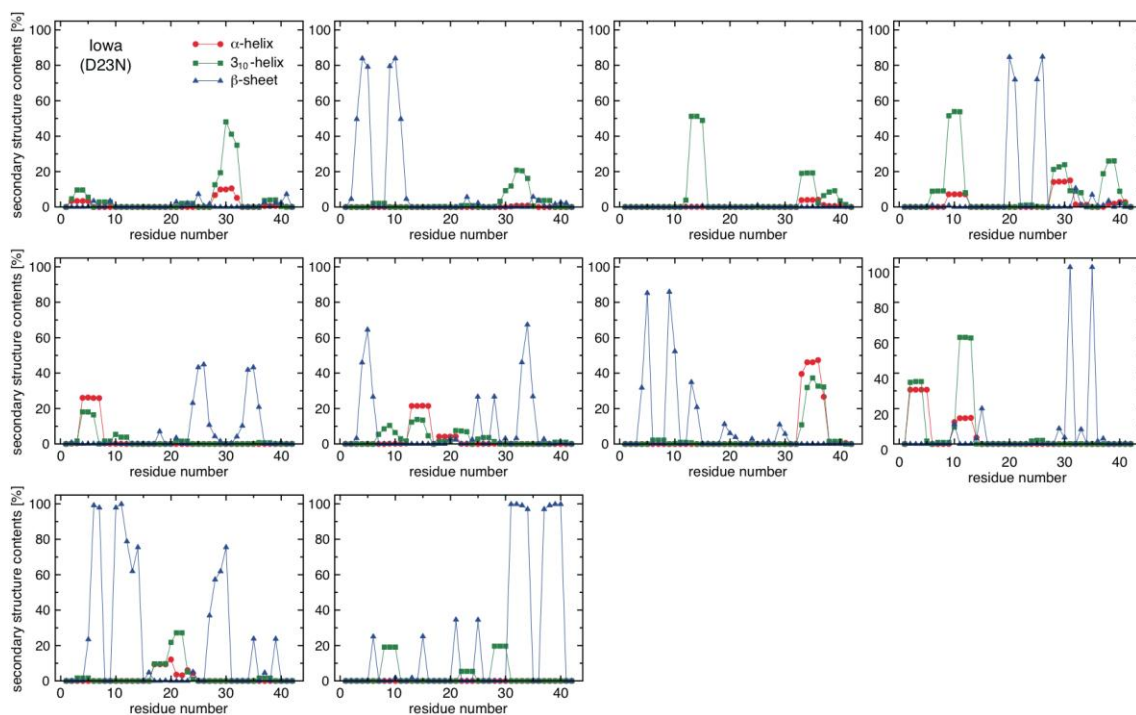

**Figure S7.** Average secondary-structure contents versus amino acid residue in each of 10 independent trajectories of the Iowa (D23N) mutant of A $\beta$ 42 (red circles:  $\alpha$ -helix, green squares:  $3_{10}$ -helix, blue triangles:  $\beta$ -sheet).
